# Supplementary material for: Biocompatible surfactants for water-in-fluorocarbon emulsions
Source: Royal Society of Chemistry journal article supplement (doi:10.1039/b806706f), 2008-01-01
Supplement: b806706f.pdf [file b806706f.pdf]

## Supplementary Information:

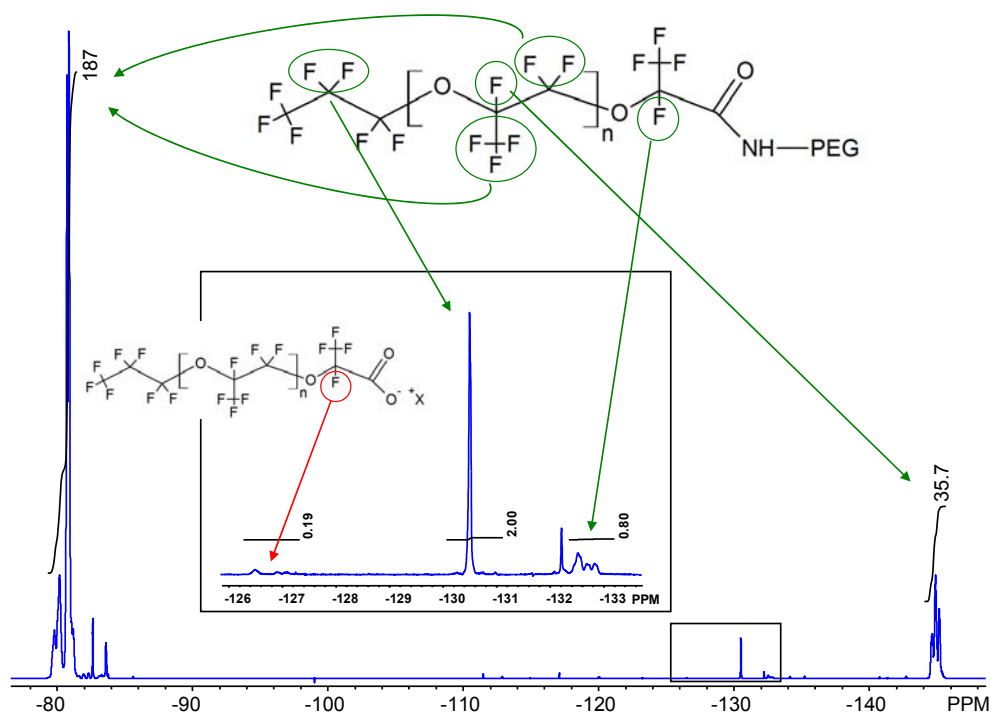

The molecular structure of the E2K0660 surfactant was determined by  $^{19}\text{F}$  NMR spectroscopy. The figure reveals assignments for different fluorine signals used to characterize the material for molecular structure and number-average molecular weight. Integration values for the repeat unit fluorine signals at ca. -80 ppm and -145 ppm indicate that the  $M_n$  of the PFPE block is ca. 6000 g/mol. Furthermore, inspection of the NMR region at -132 to -133 ppm reveals that ca. 80% of the acid chloride end groups of the PFPE have been converted to the non-ionic amide coupling to PEG. The balance of the PFPE carboxylate is an ionic species, which is indicated by the broad multiplet at -126 to -127 ppm.
